# Supplementary material for: Core–spacer–shell structured NaGdF4:Yb3+/Er3+@NaGdF4@Ag nanoparticles for plasmon-enhanced upconversion luminescence
Source: Royal Society of Chemistry journal article supplement (doi:10.1039/c5ra27881c), 2016-01-01
Supplement: c5ra27881c1.pdf [file c5ra27881c1.pdf]

## Supporting Information

### **Core-spacer-shell Structured NaGdF<sub>4</sub>: Yb<sup>3+</sup>/Er<sup>3+</sup>@NaGdF<sub>4</sub>@Ag Nanoparticles for Plasmon-enhanced Upconversion**

#### **Luminescence**

Xindan Zhang<sup>[a,b]</sup>, Bin Li<sup>\*[a]</sup>, Mingming Jiang<sup>[a]</sup>, Liming Zhang<sup>[a]</sup>, Heping  
Ma<sup>[a]</sup>

*[a] State Key Laboratory of Luminescence and Applications, Changchun  
Institute of Optics Fine Mechanics and Physics, Chinese Academy of  
Sciences, Changchun 130033, P. R. China*

*[b] University of Chinese Academy of Sciences, Beijing 100049, PR China.*

---

\*Corresponding author. Tel./fax: +86431 86176935.  
E-mail address: libinteacher@163.com (B. Li)

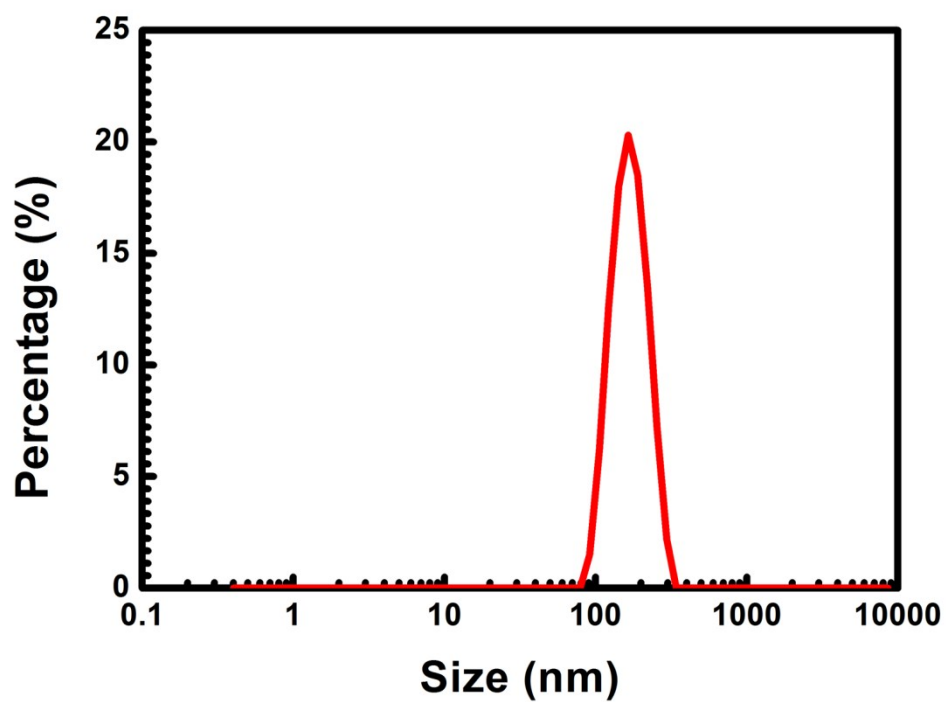

Figure S1. Dynamic light scattering measurements (DLS) of core-spacer-shell UCNPs in deionized water.

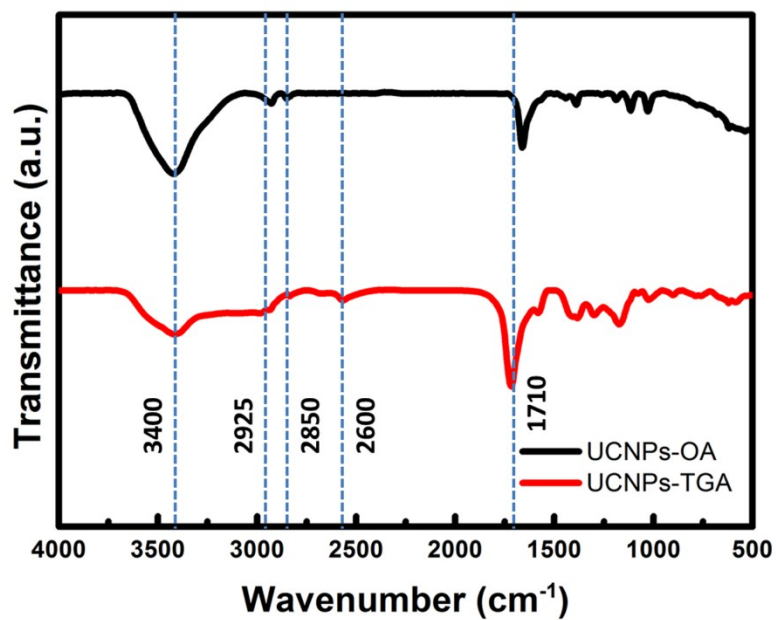

Figure S2. FT-IR spectra of UCNPs-OA (black line) and UCNPs-TGA (red line).

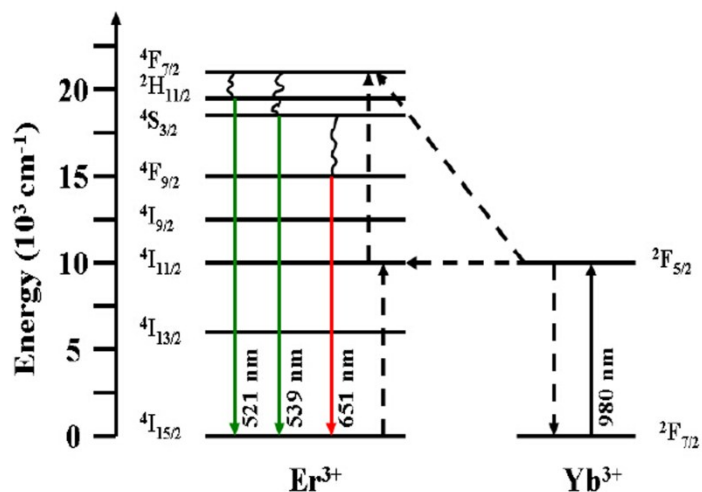

Figure S3. Energy diagram and simplified mechanism for energy-transfer upconversion between  $\text{Yb}^{3+}$  and  $\text{Er}^{3+}$ .

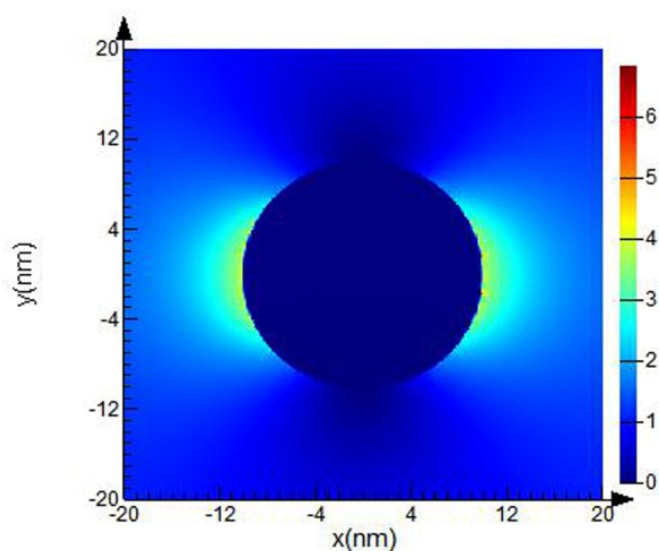

Figure S4. FDTD simulations of electric field intensity enhancement at 980 nm a single of core-spacer-shell structured UCNPs model: a 14 nm  $\text{NaGdF}_4$  core ( $n = 1.29$ ), with a 1.75 nm  $\text{NaGdF}_4$  spacer layer ( $n = 1.29$ ) and a 1.5 nm Ag shell ( $n = 0.20$ ), color bar indicates  $E/E_0$ .

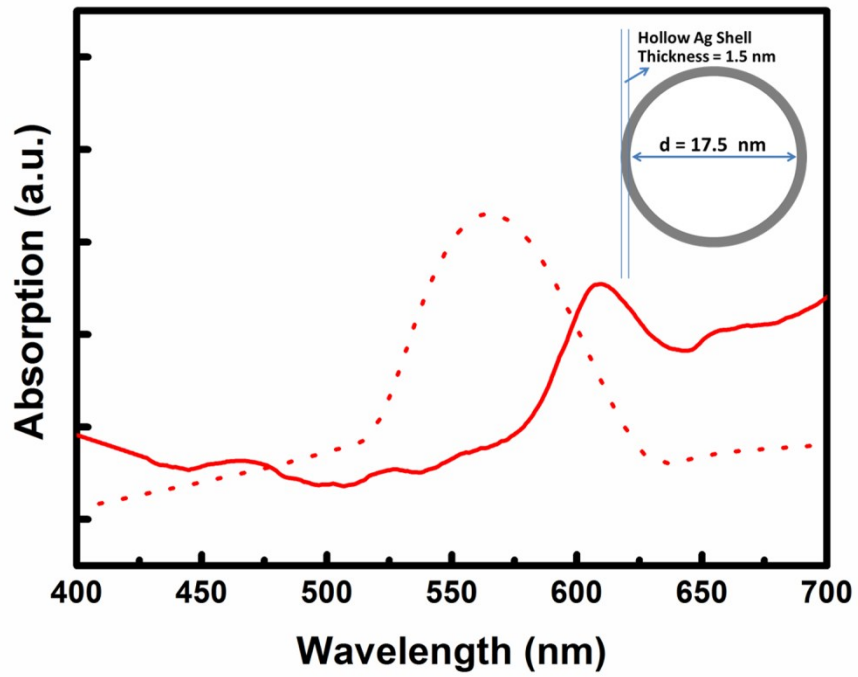

Figure S5. Dotted line: FDTD simulated absorption of a hollow Ag shell, inset is the picture of hollow Ag shell; Solid line: absorption of core-spacer-shell UCNPs.
